# Supplementary material for: Attenuated effector T cells are linked to control of chronic HBV infection
Source: Springer Nature journal article supplement (doi:10.1038/s41590-024-01928-4), 2024-08-28
Supplement: MOESM1 [file 41590_2024_1928_MOESM1_ESM.pdf]

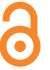

---

# Attenuated effector T cells are linked to control of chronic HBV infection

---

In the format provided by the authors and unedited

**A**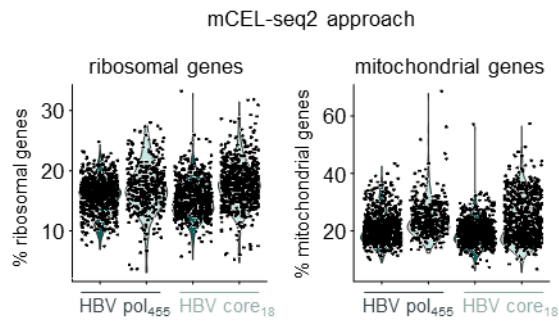**Clinical phases**

- endogenous control/chronic HBV
- NUC control/chronic HBV

**B**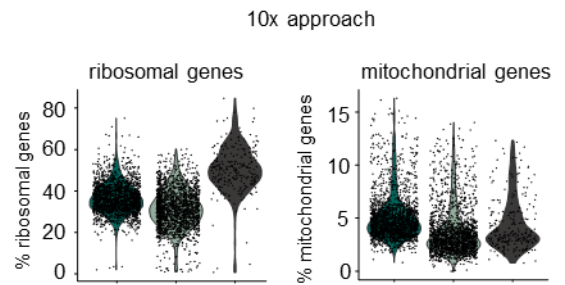**HBV pol<sub>455</sub>**

- endogenous control/chronic HBV
- acute HBV
- acute resolved HBV

**Supplementary figure 1:**

Percentage of ribosomal and mitochondrial genes in **(A)** HBV core<sub>18</sub>-specific and HBV pol<sub>455</sub>-specific CD8<sup>+</sup> T cells of endogenous control/chronic HBV and NUC control/chronic HBV and in **(B)** HBV pol<sub>455</sub>-specific CD8<sup>+</sup> T cells of endogenous control/chronic HBV, acute and acute resolved HBV infection are depicted.

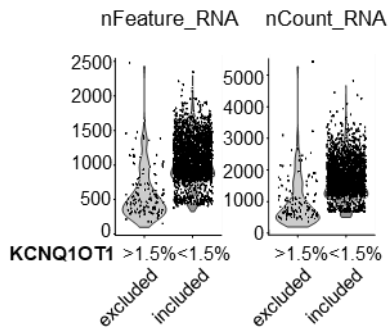

**Supplementary figure 2:**

Violin Plots showing the number of genes and transcripts per cell of cells with > 1.5% KCNQ10T1 transcripts and cells with < 1.5% KCNQ10T1 transcripts which were included in the analysis. Note that the numbers of genes and transcripts per cell are significantly lower in cells with > 1.5% KCNQ10T1 transcripts indicating that these are low quality cells.

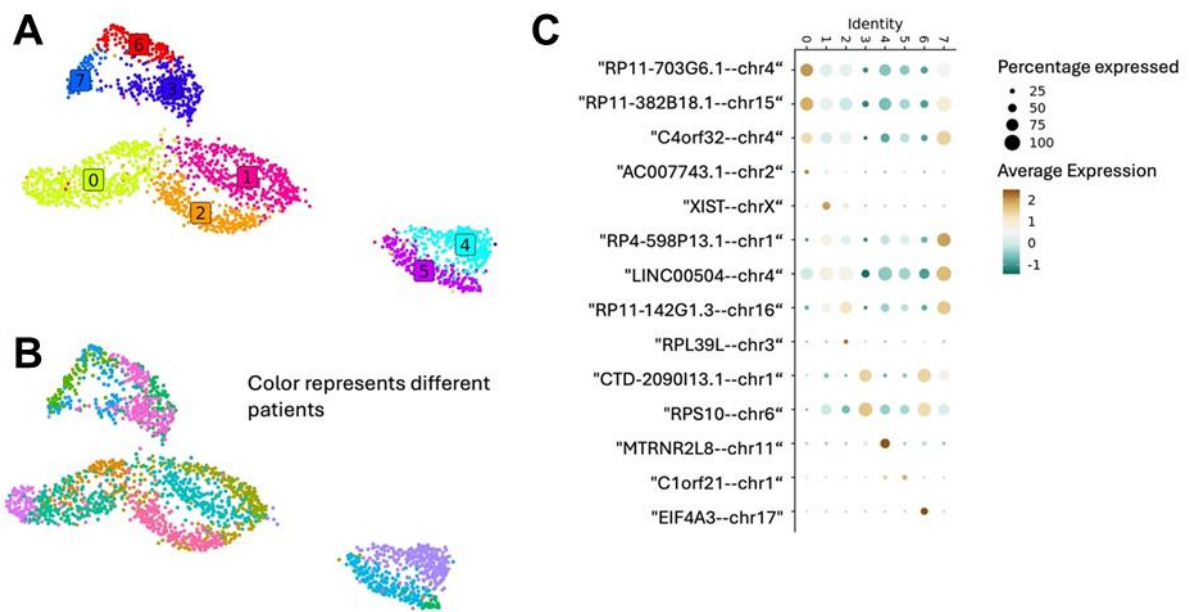

**Supplementary figure 3:**

UMAP representation showing **(A)** clusters and **(B)** patients of HBV-specific T cells without batch correction in different colors. Note that without batch correction, clustering is primarily governed by patients. **(C)** Differential gene expression analysis of this clustering further reveals many non-long coding RNAs and ribosomal proteins differentially expressed among patients and dominated the differential gene expression analysis. Few examples are shown in the Dot plot.

**Supplementary Table 1:** Study cohort of HLA-A\*02:01 positive individuals with endogenous control (HBeAg- cHBV infection)

| Patient ID | Sex | Age | Diagnose | Clinical Phase        | Therapy | Viral Load [IU/ml] | ALT [U/ml] | AST [U/ml] | Used epitope                                  |
|------------|-----|-----|----------|-----------------------|---------|--------------------|------------|------------|-----------------------------------------------|
| cHBV#1     | F   | 29  | cHBV     | HBeAg- cHBV infection | naive   | 31                 | 19         | 23         | HBV core <sub>18</sub>                        |
| cHBV#2     | F   | 53  | cHBV     | HBeAg- cHBV infection | naive   | 1795               | 46         | 31         | HBV core <sub>18</sub>                        |
| cHBV#3     | F   | 44  | cHBV     | HBeAg- cHBV infection | naive   | 915                | 28         | nd         | HBV core <sub>18</sub>                        |
| cHBV#4     | F   | 33  | cHBV     | HBeAg- cHBV infection | naive   | 2456               | 36         | 25         | HBV pol <sub>455</sub>                        |
| cHBV#5     | F   | 57  | cHBV     | HBeAg- cHBV infection | naive   | 2392               | 16         | 28         | HBV pol <sub>455</sub>                        |
| cHBV#6     | M   | 52  | cHBV     | HBeAg- cHBV infection | naive   | neg                | 29         | 32         | HBV core <sub>18</sub>                        |
| cHBV#7     | F   | 36  | cHBV     | HBeAg- cHBV infection | naive   | 1033               | 17         | 19         | HBV core <sub>18</sub>                        |
| cHBV#8     | F   | 43  | cHBV     | HBeAg- cHBV infection | naive   | 202                | 18         | 16         | HBV core <sub>18</sub>                        |
| cHBV#9     | M   | 31  | cHBV     | HBeAg- cHBV infection | naive   | 3148               | 22         | 23         | HBV pol <sub>455</sub>                        |
| cHBV#10    | M   | 53  | cHBV     | HBeAg- cHBV infection | naive   | 1356               | 37         | 40         | HBV core <sub>18</sub>                        |
| cHBV#11    | M   | 64  | cHBV     | HBeAg- cHBV infection | naive   | 1480               | nd         | 30         | HBV pol <sub>455</sub>                        |
| cHBV#12    | F   | 49  | cHBV     | HBeAg- cHBV infection | naive   | 114                | 26         | 19         | HBV pol <sub>455</sub>                        |
| cHBV#13    | F   | 39  | cHBV     | HBeAg- cHBV infection | naive   | 543                | 22         | 17         | HBV pol <sub>455</sub>                        |
| cHBV#14    | M   | 38  | cHBV     | HBeAg- cHBV infection | naive   | 5128               | 26         | 29         | HBV pol <sub>455</sub>                        |
| cHBV#15    | F   | 33  | cHBV     | HBeAg- cHBV infection | naive   | 59                 | 25         | 24         | HBV core <sub>18</sub>                        |
| cHBV#16    | F   | 38  | cHBV     | HBeAg- cHBV infection | naive   | 82                 | 24         | 23         | HBV core <sub>18</sub>                        |
| cHBV#17    | M   | 60  | cHBV     | HBeAg- cHBV infection | naive   | 189                | 21         | 20         | HBV core <sub>18</sub>                        |
| cHBV#18    | F   | 21  | cHBV     | HBeAg- cHBV infection | naive   | 1901               | 23         | 30         | HBV pol <sub>455</sub>                        |
| cHBV#19    | M   | 43  | cHBV     | HBeAg- cHBV infection | naive   | 644                | 29         | 44         | HBV pol <sub>455</sub>                        |
| cHBV#20    | F   | 34  | cHBV     | HBeAg- cHBV infection | naive   | 1495               | nd         | 10         | HBV core <sub>18</sub>                        |
| cHBV#21    | M   | 33  | cHBV     | HBeAg- cHBV infection | naive   | 1181               | 24         | 24         | HBV core <sub>18</sub>                        |
| cHBV#22    | M   | 61  | cHBV     | HBeAg- cHBV infection | naive   | 377                | 30         | 18         | HBV pol <sub>455</sub>                        |
| cHBV#23    | F   | 28  | cHBV     | HBeAg- cHBV infection | naive   | 93                 | 20         | 22         | HBV core <sub>18</sub> HBV pol <sub>455</sub> |
| cHBV#24    | F   | 54  | cHBV     | HBeAg- cHBV infection | naive   | 683                | 24         | 27         | HBV core <sub>18</sub>                        |
| cHBV#25    | F   | 36  | cHBV     | HBeAg- cHBV infection | naive   | 585                | 22         | 25         | HBV core <sub>18</sub>                        |
| cHBV#26    | F   | 34  | cHBV     | HBeAg- cHBV infection | naive   | 28                 | 18         | 13         | HBV core <sub>18</sub>                        |
| cHBV#27    | F   | 36  | cHBV     | HBeAg- cHBV infection | naive   | 439                | 21         | 19         | HBV core <sub>18</sub>                        |
| cHBV#28    | F   | 34  | cHBV     | HBeAg- cHBV infection | naive   | 2625               | 24         | 14         | HBV pol <sub>455</sub>                        |
| cHBV#29    | M   | 44  | cHBV     | HBeAg- cHBV infection | naive   | 5978               | 24         | 29         | HBV pol <sub>455</sub>                        |
| cHBV#30    | F   | 32  | cHBV     | HBeAg- cHBV infection | naive   | 1710               | 26         | 25         | HBV pol <sub>455</sub>                        |
| cHBV#31    | M   | 34  | cHBV     | HBeAg- cHBV infection | naive   | 1531               | 28         | 45         | HBV core <sub>18</sub>                        |
| cHBV#32    | F   | 54  | cHBV     | HBeAg- cHBV infection | naive   | neg                | 28         | 29         | HBV core <sub>18</sub>                        |
| cHBV#33    | M   | 40  | cHBV     | HBeAg- cHBV infection | naive   | neg                | nd         | 17         | HBV pol <sub>455</sub>                        |
| cHBV#34    | M   | 22  | cHBV     | HBeAg- cHBV infection | naive   | 1,469              | 30         | 21         | HBV pol <sub>455</sub>                        |

|         |   |    |      |                       |       |      |    |    |                        |                        |
|---------|---|----|------|-----------------------|-------|------|----|----|------------------------|------------------------|
| cHBV#35 | M | 43 | cHBV | HBeAg- cHBV infection | naive | 882  | 26 | 21 |                        | HBV pol <sub>455</sub> |
| cHBV#36 | F | 35 | cHBV | HBeAg- cHBV infection | naive | 902  | 25 | 20 | HBV core <sub>18</sub> |                        |
| cHBV#37 | F | 34 | cHBV | HBeAg- cHBV infection | naive | 322  | 23 | 20 | HBV core <sub>18</sub> | HBV pol <sub>455</sub> |
| cHBV#38 | F | 55 | cHBV | HBeAg- cHBV infection | naive | 27   | 23 | 22 | HBV core <sub>18</sub> | HBV pol <sub>455</sub> |
| cHBV#39 | F | 36 | cHBV | HBeAg- cHBV infection | naive | 777  | 18 | 22 |                        | HBV pol <sub>455</sub> |
| cHBV#40 | M | 28 | cHBV | HBeAg- cHBV infection | naive | 1854 | 58 | 93 |                        | HBV pol <sub>455</sub> |
| cHBV#41 | F | 35 | cHBV | HBeAg- cHBV infection | naive | 250  | 25 | 20 |                        | HBV pol <sub>455</sub> |
| cHBV#42 | F | 49 | cHBV | HBeAg- cHBV infection | naive | 1352 | 30 | 30 |                        | HBV pol <sub>455</sub> |
| cHBV#43 | F | 41 | cHBV | HBeAg- cHBV infection | naive | 544  | 17 | 13 |                        | HBV pol <sub>455</sub> |

Abbreviations: ALT: alanine aminotransaminase, AST: aspartate aminotransferase, F: female, M: male, neg: negative, nd: not done

**Supplementary Table 2:** Study cohort of HLA-A\*02:01 positive individuals with high viral load (HBeAg- CHB)

| Patient ID | Sex | Age | Diagnose | Clinical Phase       | Therapy | Viral Load [IU/ml] | ALT [U/ml] | AST [U/ml] | Used epitope           |                        |
|------------|-----|-----|----------|----------------------|---------|--------------------|------------|------------|------------------------|------------------------|
| cHBV#44    | M   | 42  | cHBV     | HBeAg- CHB (high VL) | naive   | 11000000           | 233        | 98         |                        | HBV pol <sub>455</sub> |
| cHBV#45    | F   | 25  | cHBV     | HBeAg- CHB (high VL) | naive   | 11700              | 23         | 22         |                        | HBV pol <sub>455</sub> |
| cHBV#46    | F   | 37  | cHBV     | HBeAg- CHB (high VL) | naive   | 11000              | 21         | 25         |                        | HBV pol <sub>455</sub> |
| cHBV#47    | M   | 68  | cHBV     | HBeAg- CHB (high VL) | naive   | 100000             | 78         | 48         |                        | HBV pol <sub>455</sub> |
| cHBV#48    | F   | 48  | cHBV     | HBeAg- CHB (high VL) | naive   | 152882             | 22         | 23         |                        | HBV pol <sub>455</sub> |
| cHBV#49    | M   | 35  | cHBV     | HBeAg- CHB (high VL) | naive   | 3185613            | 35         | 47         |                        | HBV pol <sub>455</sub> |
| cHBV#50    | M   | 41  | cHBV     | HBeAg- CHB (high VL) | naive   | 11144              | 40         | 107        |                        | HBV pol <sub>455</sub> |
| cHBV#51    | F   | 61  | cHBV     | HBeAg- CHB (high VL) | naive   | 92090              | 48         | 72         |                        | HBV pol <sub>455</sub> |
| cHBV#52    | M   | 67  | cHBV     | HBeAg- CHB (high VL) | naive   | 9000               | 25         | 26         | HBV core <sub>18</sub> |                        |
| cHBV#53    | F   | 41  | cHBV     | HBeAg- CHB (high VL) | naive   | 10000              | 12         | 24         | HBV core <sub>18</sub> |                        |

Abbreviations: ALT: alanine aminotransaminase, AST: aspartate aminotransferase, F: female, M: male

**Supplementary Table 3:** Study cohort of HLA-A\*02:01 positive individuals with NUC control (NUC-treated HBeAg- CHB)

| Patient ID | Sex | Age | Diagnose | Clinical Phase                  | Therapy     | Viral Load [IU/ml] | ALT [U/ml] | AST [U/ml] | Used epitope           |                        |
|------------|-----|-----|----------|---------------------------------|-------------|--------------------|------------|------------|------------------------|------------------------|
| cHBV#54    | M   | 23  | cHBV     | NUC-treated HBeAg- CHB (low VL) | Entecavir   | 2602               | 24         | 21         | HBV core <sub>18</sub> |                        |
| cHBV#55    | M   | 54  | cHBV     | NUC-treated HBeAg- CHB (low VL) | Tenofovir   | neg                | 27         | 43         | HBV core <sub>18</sub> | HBV pol <sub>455</sub> |
| cHBV#56    | M   | 50  | cHBV     | NUC-treated HBeAg- CHB (low VL) | Entecavir   | neg                | 32         | 34         | HBV core <sub>18</sub> | HBV pol <sub>455</sub> |
| cHBV#57    | F   | 35  | cHBV     | NUC-treated HBeAg- CHB (low VL) | Tenofovir   | neg                | 30         | 35         |                        | HBV pol <sub>455</sub> |
| cHBV#58    | F   | 62  | cHBV     | NUC-treated HBeAg- CHB (low VL) | Entecavir   | neg                | 30         | 24         |                        | HBV pol <sub>455</sub> |
| cHBV#59    | F   | 65  | cHBV     | NUC-treated HBeAg- CHB (low VL) | Tenofovir   | neg                | 22         | 20         | HBV core <sub>18</sub> |                        |
| cHBV#60    | M   | 44  | cHBV     | NUC-treated HBeAg- CHB (low VL) | Tenofovir   | neg                | 28         | 26         |                        | HBV pol <sub>455</sub> |
| cHBV#61    | M   | 34  | cHBV     | NUC-treated HBeAg- CHB (low VL) | Entecavir   | neg                | 22         | 36         |                        | HBV pol <sub>455</sub> |
| cHBV#62    | M   | 38  | cHBV     | NUC-treated HBeAg- CHB (low VL) | Tenofovir   | neg                | 20         | 25         | HBV core <sub>18</sub> | HBV pol <sub>455</sub> |
| cHBV#63    | M   | 57  | cHBV     | NUC-treated HBeAg- CHB (low VL) | Telbivudine | neg                | 27         | 30         |                        | HBV pol <sub>455</sub> |
| cHBV#64    | M   | 55  | cHBV     | NUC-treated HBeAg- CHB (low VL) | Tenofovir   | 607                | 37         | 45         |                        | HBV pol <sub>455</sub> |
| cHBV#65    | M   | 55  | cHBV     | NUC-treated HBeAg- CHB (low VL) | Tenofovir   | neg                | 32         | 33         |                        | HBV pol <sub>455</sub> |
| cHBV#66    | M   | 41  | cHBV     | NUC-treated HBeAg- CHB (low VL) | Tenofovir   | neg                | 25         | 33         |                        | HBV pol <sub>455</sub> |
| cHBV#67    | F   | 57  | cHBV     | NUC-treated HBeAg- CHB (low VL) | Tenofovir   | neg                | 26         | 24         |                        | HBV pol <sub>455</sub> |
| cHBV#68    | M   | 75  | cHBV     | NUC-treated HBeAg- CHB (low VL) | Tenofovir   | neg                | 27         | 23         | HBV core <sub>18</sub> | HBV pol <sub>455</sub> |
| cHBV#69    | M   | 38  | cHBV     | NUC-treated HBeAg- CHB (low VL) | Entecavir   | neg                | 26         | 44         | HBV core <sub>18</sub> |                        |
| cHBV#70    | M   | 56  | cHBV     | NUC-treated HBeAg- CHB (low VL) | Entecavir   | neg                | 26         | 30         | HBV core <sub>18</sub> |                        |
| cHBV#71    | F   | 67  | cHBV     | NUC-treated HBeAg- CHB (low VL) | Entecavir   | 25                 | 44         | 67         | HBV core <sub>18</sub> |                        |
| cHBV#72    | M   | 29  | cHBV     | NUC-treated HBeAg- CHB (low VL) | Entecavir   | neg                | 36         | 22         | HBV core <sub>18</sub> |                        |
| cHBV#73    | M   | 78  | cHBV     | NUC-treated HBeAg- CHB (low VL) | Entecavir   | neg                | 25         | 24         | HBV core <sub>18</sub> |                        |
| cHBV#74    | M   | 36  | cHBV     | NUC-treated HBeAg- CHB (low VL) | Tenofovir   | 19                 | 26         | 45         |                        | HBV pol <sub>455</sub> |
| cHBV#75    | F   | 55  | cHBV     | NUC-treated HBeAg- CHB (low VL) | Entecavir   | neg                | 22         | 14         |                        | HBV pol <sub>455</sub> |
| cHBV#76    | M   | 74  | cHBV     | NUC-treated HBeAg- CHB (low VL) | Tenofovir   | neg                | 17         | 14         | HBV core <sub>18</sub> | HBV pol <sub>455</sub> |
| cHBV#77    | F   | 55  | cHBV     | NUC-treated HBeAg- CHB (low VL) | Tenofovir   | neg                | 28         | 29         | HBV core <sub>18</sub> |                        |
| cHBV#78    | M   | 56  | cHBV     | NUC-treated HBeAg- CHB (low VL) | Tenofovir   | neg                | nd         | 52         | HBV core <sub>18</sub> |                        |
| cHBV#79    | F   | 47  | cHBV     | NUC-treated HBeAg- CHB (low VL) | Entecavir   | neg                | 31         | 31         |                        | HBV pol <sub>455</sub> |
| cHBV#80    | F   | 60  | cHBV     | NUC-treated HBeAg- CHB (low VL) | Tenofovir   | neg                | 30         | 36         |                        | HBV pol <sub>455</sub> |

Abbreviations: ALT: alanine aminotransaminase, AST: aspartate aminotransferase, F: female, M: male, neg: negative, nd: not done, NUC: nucleos(t)ide analogues



**Supplementary Table 4:** Study cohort of HLA-B\*35:01 positive individuals with chronic HBV infection

| Patient ID | Sex | Age | Diagnose | Clinical Phase         | Therapy   | Viral Load [IU/ml] | ALT [U/ml] | AST [U/ml] | Used epitope           |
|------------|-----|-----|----------|------------------------|-----------|--------------------|------------|------------|------------------------|
| cHBV#81    | F   | 34  | cHBV     | HBeAg- cHBV infection  | naive     | 929                | 20         | 13         | HBV pol <sub>173</sub> |
| cHBV#82    | M   | 30  | cHBV     | HBeAg- cHBV infection  | naive     | 2908               | 26         | 34         | HBV pol <sub>173</sub> |
| cHBV#83    | F   | 61  | cHBV     | HBeAg- cHBV infection  | naive     | 273                | 18         | 16         | HBV pol <sub>173</sub> |
| cHBV#84    | F   | 52  | cHBV     | HBeAg- cHBV infection  | naive     | 309                | 20         | 22         | HBV pol <sub>173</sub> |
| cHBV#85    | F   | 31  | cHBV     | HBeAg- cHBV infection  | naive     | neg                | 15         | 13         | HBV pol <sub>173</sub> |
| cHBV#86    | M   | 56  | cHBV     | HBeAg- cHBV infection  | naive     | neg                | 38         | 58         | HBV pol <sub>173</sub> |
| cHBV#87    | F   | 49  | cHBV     | HBeAg- cHBV infection  | naive     | 233                | 27         | 26         | HBV pol <sub>173</sub> |
| cHBV#88    | M   | 34  | cHBV     | NUC-treated HBeAg- CHB | Tenofovir | neg                | 30         | 35         | HBV pol <sub>173</sub> |
| cHBV#89    | M   | 37  | cHBV     | NUC-treated HBeAg- CHB | Entecavir | neg                | 33         | 43         | HBV pol <sub>173</sub> |
| cHBV#90    | M   | 24  | cHBV     | NUC-treated HBeAg- CHB | Tenofovir | neg                | 25         | 35         | HBV pol <sub>173</sub> |
| cHBV#91    | F   | 62  | cHBV     | NUC-treated HBeAg- CHB | Baraclude | neg                | 25         | 16         | HBV pol <sub>173</sub> |
| cHBV#92    | M   | 66  | cHBV     | NUC-treated HBeAg- CHB | Tenofovir | neg                | 25         | 26         | HBV pol <sub>173</sub> |
| cHBV#93    | F   | 55  | cHBV     | NUC-treated HBeAg- CHB | Tenofovir | neg                | 24         | 17         | HBV pol <sub>173</sub> |
| cHBV#94    | F   | 52  | cHBV     | NUC-treated HBeAg- CHB | Baraclude | neg                | nd         | 12         | HBV pol <sub>173</sub> |

Abbreviations: ALT: alanine aminotransaminase, AST: aspartate aminotransferase, F: female, M: male, neg: negative, NUC: nucleos(t)ide analogues

**Supplementary Table 5:** Study cohort of HLA-A\*02:01 positive individuals with self-limiting acute HBV infection

| Patient ID | Sex | Age | Diagnose | Viral Load [IU/ml] | ALT [U/ml] | AST [U/ml] | HBsAg | HBcAg | Used epitope           |                        |
|------------|-----|-----|----------|--------------------|------------|------------|-------|-------|------------------------|------------------------|
| aHBV#1     | M   | 40  | aHBV     | 6289               | 1697       | 4220       | pos   | pos   | HBV core <sub>18</sub> | HBV pol <sub>455</sub> |
| aHBV#2     | M   | 39  | aHBV     | 1411742            | nd         | 3862       | pos   | pos   | HBV core <sub>18</sub> | HBV pol <sub>455</sub> |
| aHBV#3     | F   | 40  | aHBV     | 6111               | nd         | 6525       | pos   | pos   | HBV core <sub>18</sub> | HBV pol <sub>455</sub> |
| aHBV#4     | M   | 57  | aHBV     | 2666803            | 2942       | 6098       | pos   | pos   | HBV core <sub>18</sub> | HBV pol <sub>455</sub> |
| aHBV#5     | M   | 48  | aHBV     | 61330507           | 762        | 1913       | pos   | pos   |                        | HBV pol <sub>455</sub> |
| aHBV#6     | M   | 38  | aHBV     | 291496             | 2233       | 2970       | pos   | pos   | HBV core <sub>18</sub> | HBV pol <sub>455</sub> |
| aHBV#7     | M   | 51  | aHBV     | 12917              | 474        | 1291       | pos   | pos   |                        | HBV pol <sub>455</sub> |
| aHBV#8     | M   | 42  | aHBV     | 6111               | nd         | 3366       | pos   | pos   |                        | HBV pol <sub>455</sub> |

Abbreviations: ALT: alanine aminotransaminase, AST: aspartate aminotransferase, F: female, M: male, nd: not done, pos: positive

**Supplementary Table 6:** Study cohort of HLA-A\*02:01 positive individuals with acute-resolved HBV infection

| Patient ID | Sex | Age | Diagnose | Viral Load [IU/ml] | ALT [U/ml] | AST [U/ml] | HBsAg | HBcAg | Used epitope           |                        |
|------------|-----|-----|----------|--------------------|------------|------------|-------|-------|------------------------|------------------------|
| rHBV#1     | M   | 38  | rHBV     | neg                | 18         | 17         | neg   | pos   | HBV core <sub>18</sub> | HBV pol <sub>455</sub> |
| rHBV#2     | M   | 49  | rHBV     | neg                | 24         | 23         | neg   | pos   |                        | HBV pol <sub>455</sub> |
| rHBV#3     | M   | 55  | rHBV     | nd                 | 25         | 21         | neg   | pos   | HBV core <sub>18</sub> | HBV pol <sub>455</sub> |
| rHBV#4     | M   | 59  | rHBV     | neg                | 35         | 37         | neg   | pos   | HBV core <sub>18</sub> | HBV pol <sub>455</sub> |
| rHBV#5     | M   | 43  | rHBV     | neg                | 16         | 19         | neg   | pos   | HBV core <sub>18</sub> | HBV pol <sub>455</sub> |
| rHBV#6     | F   | 41  | rHBV     | neg                | 25         | 20         | neg   | pos   |                        | HBV pol <sub>455</sub> |
| rHBV#7     | M   | 34  | rHBV     | neg                | 20         | 28         | neg   | pos   |                        | HBV pol <sub>455</sub> |
| rHBV#8     | F   | 58  | rHBV     | neg                | 34         | 28         | neg   | pos   | HBV core <sub>18</sub> | HBV pol <sub>455</sub> |
| rHBV#9     | F   | 55  | rHBV     | neg                | 42         | 29         | neg   | pos   |                        | HBV pol <sub>455</sub> |
| rHBV#10    | M   | 52  | rHBV     | neg                | 26         | 22         | neg   | pos   |                        | HBV pol <sub>455</sub> |
| rHBV#11    | M   | 64  | rHBV     | neg                | 19         | 15         | neg   | pos   |                        | HBV pol <sub>455</sub> |

Abbreviations: ALT: alanine aminotransaminase, AST: aspartate aminotransferase, F: female, M: male, neg: negative, nd: not done, pos: positive
